# Supplementary material for: Simple photoreduction of carbon dioxide to formic acid and true quantum yield
Source: Royal Society of Chemistry journal article supplement (doi:10.1039/c9cp06707h), 2020-01-01
Supplement: c9cp06707h1.pdf [file c9cp06707h1.pdf]

## Simple Photoreduction of Carbon Dioxide to Formic Acid and True Quantum Yield

Ovuokenye Omadoko,<sup>a</sup> Dane Scott,<sup>\*a</sup> Ronald Hickman,<sup>a</sup> and Dwight L. Myers<sup>b</sup>

### Supplemental Figure S1.

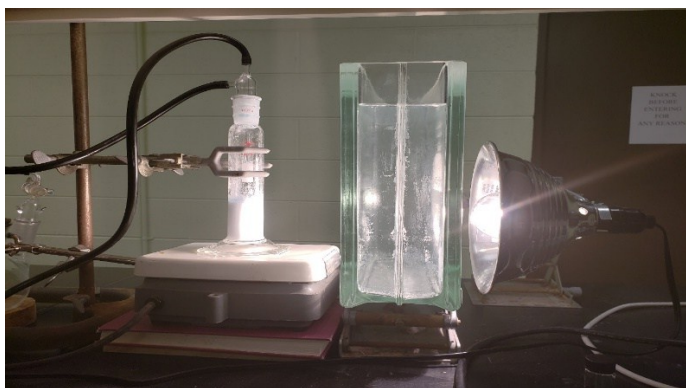

Figure S1. Photoreduction experimental setup (Photographed by Ovuokenye Omadoko).

### S2: Stoichiometric Yield Based on the Amount of Carbon Dioxide.

$$P_{CO_2} = k_H [CO_2]_{aq} \quad (S1)$$

Equation S1 was used to find the theoretical yield by determining the amount of formate possible. In this equation,  $P_{CO_2}$  represents pressure of atmospheric  $CO_2$  in atm, and 'k<sub>H</sub>' is Henry's constant for  $CO_2$  in atm/M at room temperature (29 atm/M).<sup>23</sup> At 1.00 atm the concentration of aqueous  $CO_2$  can be calculated using equation S1 and is 0.034 M. Equation S2 shows the conversion of this concentration to ppm.

$$\left(\frac{0.034 \text{ mol CO}_2}{\text{L}}\right)\left(\frac{1 \text{ mol HCOOH}}{1 \text{ mol CO}_2}\right)\left(\frac{45.00 \text{ g}}{1 \text{ mol HCOOH}}\right)\left(\frac{1,000 \text{ mg}}{1 \text{ g}}\right) = 1,530 \text{ ppm formate}$$

(S2)

Using the experimental yield of formate after 96 hours of illumination of the TiO<sub>2</sub>/InPC system (23.5 ppm), and the theoretical yield of 1,530 ppm results in a stoichiometric yield of 1.54%.

### S3: Calculating the True Quantum Yield.

A Hamamatsu S2387 33R photodiode was calibrated using the potassium iron oxalate actinometry method using Equation S3.<sup>63</sup>

$$N_q = \frac{\Delta A V_1 V_3}{\Phi(\lambda) \epsilon(514 \text{ nm}) V_2 l t}$$

(S3)

$N_q$  is moles of incident photons in einsteins per second. The quantity  $\Delta A$  is the change in absorbance of the iron 1,10-phenanthroline complex before and after illumination. The term  $\Phi(\lambda)$  is the quantum yield for reduction of Fe<sup>3+</sup> to Fe<sup>2+</sup> ion, which is 0.93 for a 0.2 M potassium iron oxalate solution using 514 nm radiation. The quantity  $V_1$  is volume of K<sub>3</sub>Fe(C<sub>2</sub>O<sub>4</sub>)<sub>3</sub> solution irradiated,  $V_2$  is volume of solution analyzed after irradiation,  $V_3$  is total volume of the solution after adding 0.1% 1,10-phenanthroline buffer solution and water,  $\epsilon(514 \text{ nm})$  is the molar absorption coefficient of the iron 1,10-phenanthroline complex (11,100 L·mol<sup>-1</sup>·cm<sup>-1</sup>),  $l$  is optical pathlength and  $t$  is irradiation time in seconds. For trial 1 using equation S3, the number of moles of photons per second absorbed is calculated in Equation S4.

Table S1. Three actinometry trials calibrating the photodiode.

| Trial | Before<br>Illumination | After<br>Illumination |
|-------|------------------------|-----------------------|
|-------|------------------------|-----------------------|

|   | Absorbance | Absorbance |
|---|------------|------------|
| 1 | 0.103      | 0.169      |
| 2 | 0.103      | 0.186      |
| 3 | 0.103      | 0.181      |

$$\frac{(0.066)(3.5 \text{ mL} \times 10^{-3})(10.4 \text{ mL})}{(0.93)(11,100 \text{ Lmol}^{-1}\text{cm}^{-1})(1.2 \text{ mL})(1 \text{ cm})(18,000 \text{ s})} = 1.1 \times 10^{-11} \text{ einsteins/s}$$

(S4)

The number of einsteins/s, the photodiode current measured (1.8  $\mu\text{A}$ ), given area of the photodiode (5.7  $\text{mm}^2$ ) and incident area of heterogeneous solution (3,500  $\text{mm}^2$ ) enabled determination of a photodiode constant ( $S_{\lambda,A}$ ) in units of einsteins/(A·s). This calculation is shown in equation S5.

$$S_{\lambda,A} = \frac{(1.1 \times 10^{-11} \frac{\text{einsteins}}{\text{s}})(3,500 \text{ mm}^2)(0.7)}{(1.8 \times 10^{-6} \text{ A})(5.7 \text{ mm}^2)} = 2.6 \times 10^{-3} \text{ einsteins/(A}\cdot\text{s)}$$

(S5)

The photodiode increases in sensitivity linearly from 0.2 A/W at 400 nm to 0.5 A/W at 800 nm as given in the data sheet for the photodiode. Assuming an ideal sensitivity of 0.5 A/W across the visible range, an area ratio (0.7) of the sensitivity of the photodiode from approximately 400 to 800 nm corrects the photodiode constant in equation S5 for counting polychromatic photons.

Three trials calibrating the photodiode resulted in an average value of

$3.2 \pm 0.4 \times 10^{-3} \text{ einsteins/(A}\cdot\text{s)}$ . The calibrated photodiode was illuminated directly by the 150

W incandescent source and the direct current (183  $\mu\text{A}$ ) was measured using a multimeter. The

photodiode was also used to measure the reflected light from the heterogeneous solution and photoreactor (165  $\mu\text{A}$ ). The difference is 18  $\mu\text{A}$  and using time in seconds (86,400 s) the number of photons incident are calculated in equation S6.

$$(3.2 \pm 0.4 \times 10^{-3} \frac{\text{einsteins}}{\text{A}\cdot\text{s}})(0.18 \pm 0.06 \times 10^{-4} \text{A})(86,400 \text{ s}) = 5.0 \pm 1.8 \times 10^{-3} \text{einsteins} \quad (\text{S6})$$

To determine the number of photons absorbed, the absorbance from Diffuse UV-Visible experiments using integrated sphere measurements of the MPC/TiO<sub>2</sub> solutions was used. The spectra were integrated using Vernier logger-pro software to determine the area. To account for absorption of photons due to the added InPC only, the absorbance area of TiO<sub>2</sub> only was subtracted from the area with InPC and divided by the area of TiO<sub>2</sub> and InPC. Using 0.5 g TiO<sub>2</sub> and 10 mg InPC, the number of absorbed photons is given in Equation S7.

$$(5.0 \pm 1.8 \times 10^{-3} \text{einsteins}) \left( \frac{145.92}{957.19} \right) = 7.6 \pm 2.7 \times 10^{-4} \text{einsteins} \quad (\text{S7})$$

The amount of formate obtained using 0.5 g TiO<sub>2</sub> with 5 mg of InPC and irradiation in 50 mL solution was determined to be 3.6( $\pm$ 0.2) ppm. The corresponding number of moles is given in Equation S8.

$$\frac{(7.2 \pm 1.2 \text{ mg})(1 \text{ g})(1 \text{ mol})(0.05 \text{ L})}{(1 \text{ L})(1000 \text{ mg})(45 \text{ g})} = 8.0 \pm 1.3 \times 10^{-6} \text{ mol formate} \quad (\text{S8})$$

Considering that one einstein is a mole of photons, the quantum yield for formate obtained within 24 hours of irradiation can be calculated as shown in Equation S9.

$$\Phi_{\text{formate}} = \frac{2(8.0 \pm 1.3 \times 10^{-6} \text{ mol})}{(7.6 \pm 2.7 \times 10^{-4} \text{ einsteins})} \times 100\% = 2.1 \pm 0.8\% \quad (\text{S9})$$

The quantum yield of formate for using 0.5 g TiO<sub>2</sub> and 5 mg InPC was found to be  $1.9 \pm 0.7\%$ ,  $1.8 \pm 0.7\%$  and  $1.7 \pm 0.6\%$  after 48, 72 and 96 hours of irradiation respectively. The results indicate that quantum yield is identical within error from 24 to 96 hours of illumination.
